# Supplementary material for: Fabrication of magnetic g-C3N4 for effectively enhanced tetracycline degradation with RGO as mediator
Source: Royal Society of Chemistry journal article supplement (doi:10.1039/c8nj02994f), 2018-01-01
Supplement: c8nj02994f1.pdf [file c8nj02994f1.pdf]

## Supporting information

### **Fabrication of the magnetic g-C<sub>3</sub>N<sub>4</sub> for effectively enhanced tetracycline degradation with RGO as mediator**

Wenqian Fan<sup>a</sup>, Zhi Zhu<sup>b</sup>, Yang Yu<sup>b</sup>, Zhi Liu<sup>\*a</sup>, Chunxiang Li<sup>b</sup>, Pengwei Huo<sup>b</sup>,  
Yue Qiu<sup>c</sup>, Yongsheng Yan<sup>\*b</sup>

- a. Faculty of Chemistry and Chemical Engineering, Liaoning Normal University, Dalian 116029, P.R. China
- b. Institute of the Green Chemistry and Chemical Technology, School of Chemistry and Chemical Engineering, Jiangsu University, Zhen Jiang 212000, P.R. China
- c. Grimwade Centre for Cultural Materials Conservation, School of Historical and Philosophical Studies, Faculty of Arts, University of Melbourne, Parkville, Victoria, 3052, Australia

## **2.4 Adsorption, photocatalytic experiments**

The adsorption behavior of these samples was carried out by adsorbing tetracycline aqueous solution. In a typical reaction system, 0.05 g  $\text{Fe}_3\text{O}_4@\text{g-C}_3\text{N}_4/\text{RGO}$  was added into 100 mL, 20  $\text{mg L}^{-1}$  tetracycline solution with magnetically stirred. Then, 5 mL solutions were sampled with an injector in each 20 min until reached adsorption/desorption equilibration. The photocatalytic activities were evaluated through decomposing tetracycline under a 300 W Xe lamp with 0.05 g photocatalyst, the irradiation time was interval of every 20 min, and 4 mL solution was sampled and magnetic separated, then monitoring the absorbance of tetracycline by UV-vis spectrophotometer.

## **2.5 Photoelectrochemical measurements**

The photoelectrochemical performance of samples was investigated by the photocurrent response and electrochemical impedance spectroscopy (EIS) in a CHI852C electrochemical station with a Xenon lamp (Newport 69920, 300 W). The as-prepared samples were dipcoated onto FTO substrates ( $1.0 \text{ cm}^2$ ) and used as corresponding working electrodes. A Pt electrode and Ag/AgCl (saturated KCl) were used as counter electrode and reference electrode, respectively. EIS measurements were carried out on a ZENNIUM electrochemical workstation (Zahner Instruments, Germany).

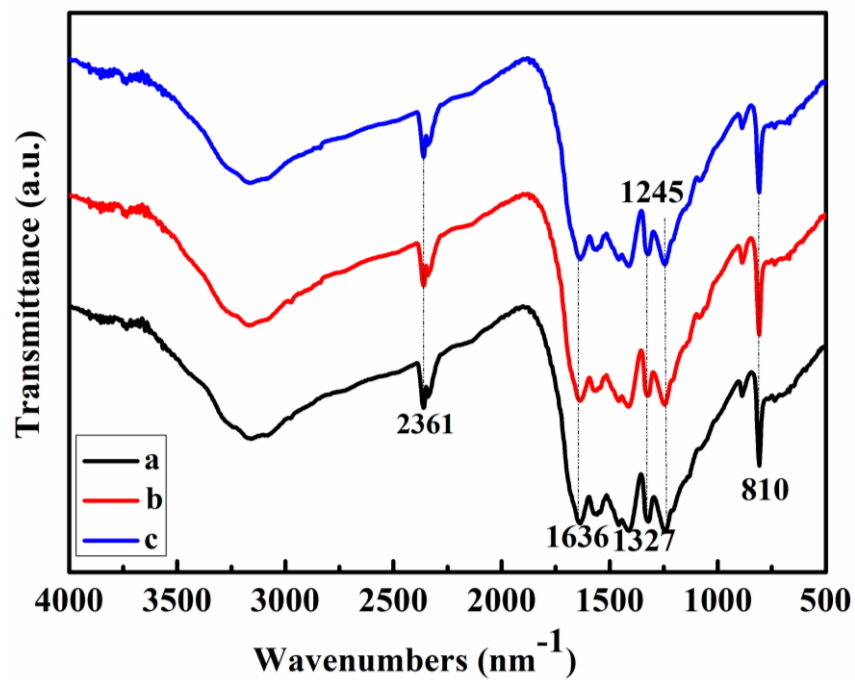

**Fig. S1** FT-IR spectra of (a)  $\text{g-C}_3\text{N}_4$ , (b) 5%  $\text{Fe}_3\text{O}_4@\text{g-C}_3\text{N}_4$  and (c) 5%  $\text{Fe}_3\text{O}_4@\text{g-C}_3\text{N}_4/\text{RGO}$

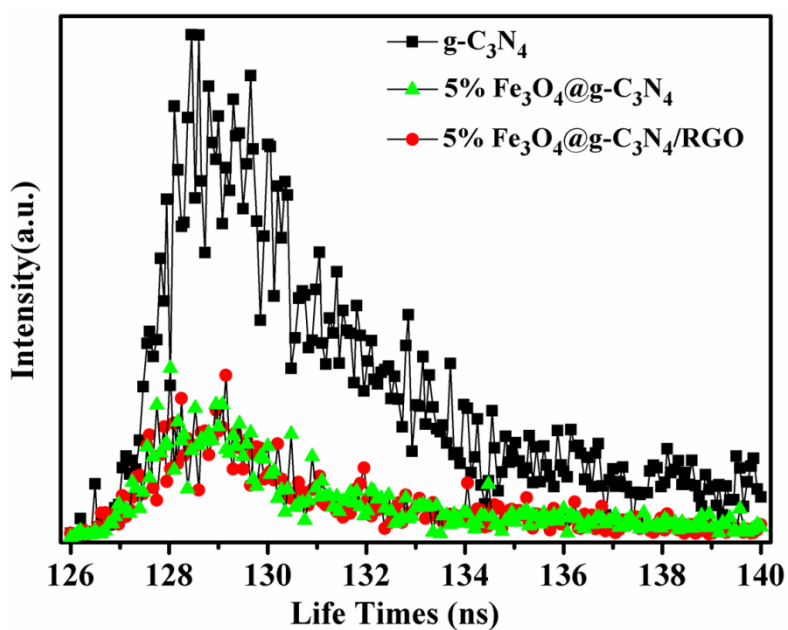

**Fig. S2** The FL spectra of  $\text{g-C}_3\text{N}_4$ , 5%  $\text{Fe}_3\text{O}_4@\text{g-C}_3\text{N}_4$  and 5%  $\text{Fe}_3\text{O}_4@\text{g-C}_3\text{N}_4/\text{RGO}$

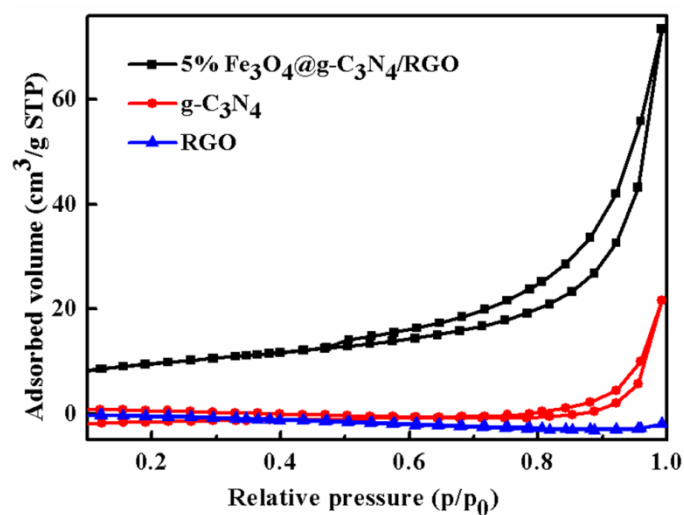

**Fig. S3** BET analysis of g-C<sub>3</sub>N<sub>4</sub>, RGO, and 5% Fe<sub>3</sub>O<sub>4</sub>@g-C<sub>3</sub>N<sub>4</sub>/RGO

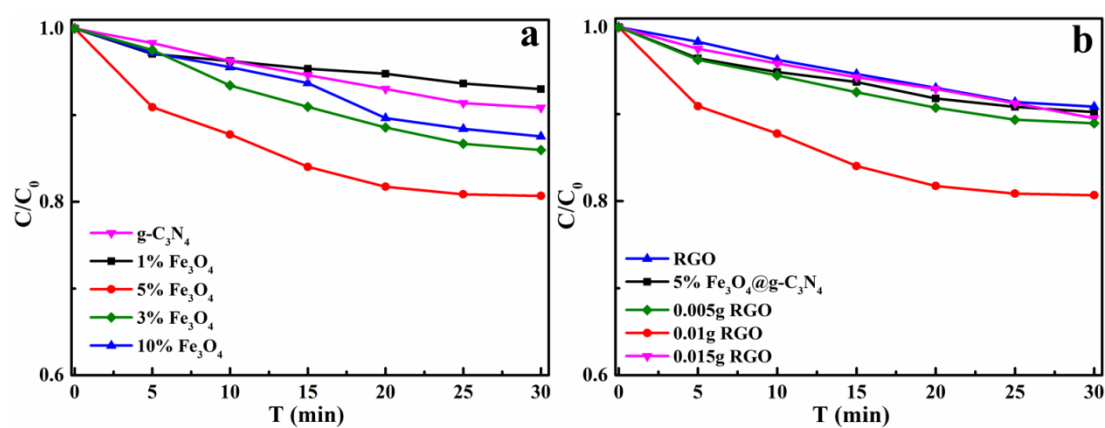

**Fig. S4** (a) The adsorption ability of tetracycline over the sample with different Fe<sub>3</sub>O<sub>4</sub> ratios and the same RGO amount (10 mg). (b) The adsorption ability of tetracycline over the sample with different RGO amount and the same Fe<sub>3</sub>O<sub>4</sub> ratios of 5% and without RGO.

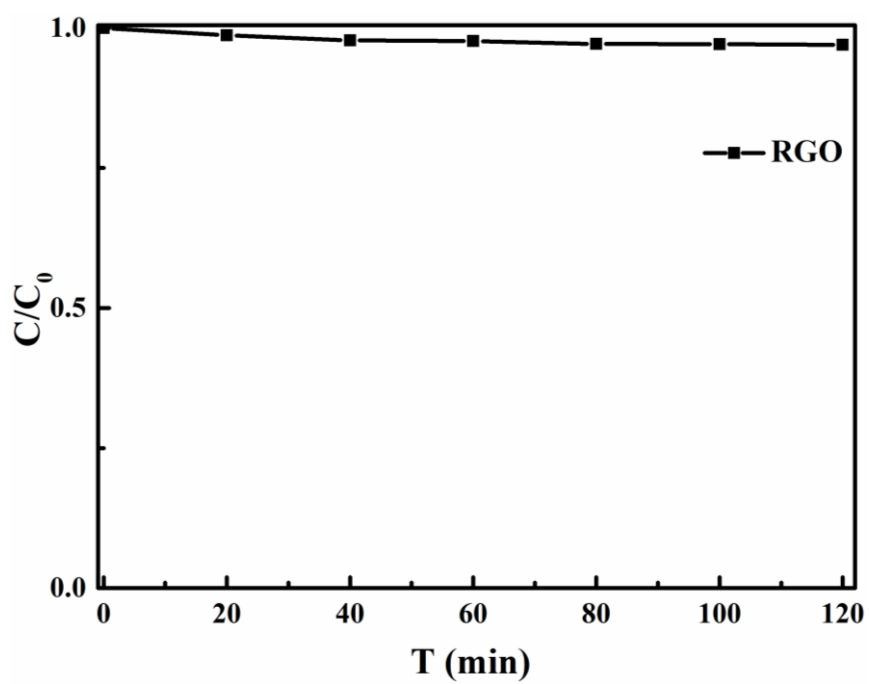

**Fig. S5** Effect of the RGO on degradation of tetracycline
